# Supplementary material
Source: PubMed Central journal article supplement (PMC9731258)
Supplement: 0372.pdf [file 0372.pdf]

**Supplemental Table 1.** Adapted one-way classifier algorithm for presurgical differentiation of PCNSL and glioblastoma/metastasis with the intercept and the relative power (coefficient) for each selected normalized time point to apply on the formula:  $(\text{Intercept}_i) + \sum (\text{variable}_i * \text{coefficient}_i)$ . The model\_variables correspond to the normalized intensity value for each concrete normalized time point.

| PCNSL vs glioblastoma/metastasis |                    |
|----------------------------------|--------------------|
| model_variables                  | model_coefficients |
| (Intercept)                      | 2.15151513221515   |
| 1.6 <sub>i</sub>                 | 28.6375383219505   |
| 1.8 <sub>i</sub>                 | 29.41774519209     |
| 2 <sub>i</sub>                   | 28.8925374257706   |
| 2.2 <sub>i</sub>                 | 26.7712443181936   |
| 2.4 <sub>i</sub>                 | 23.8223558668555   |

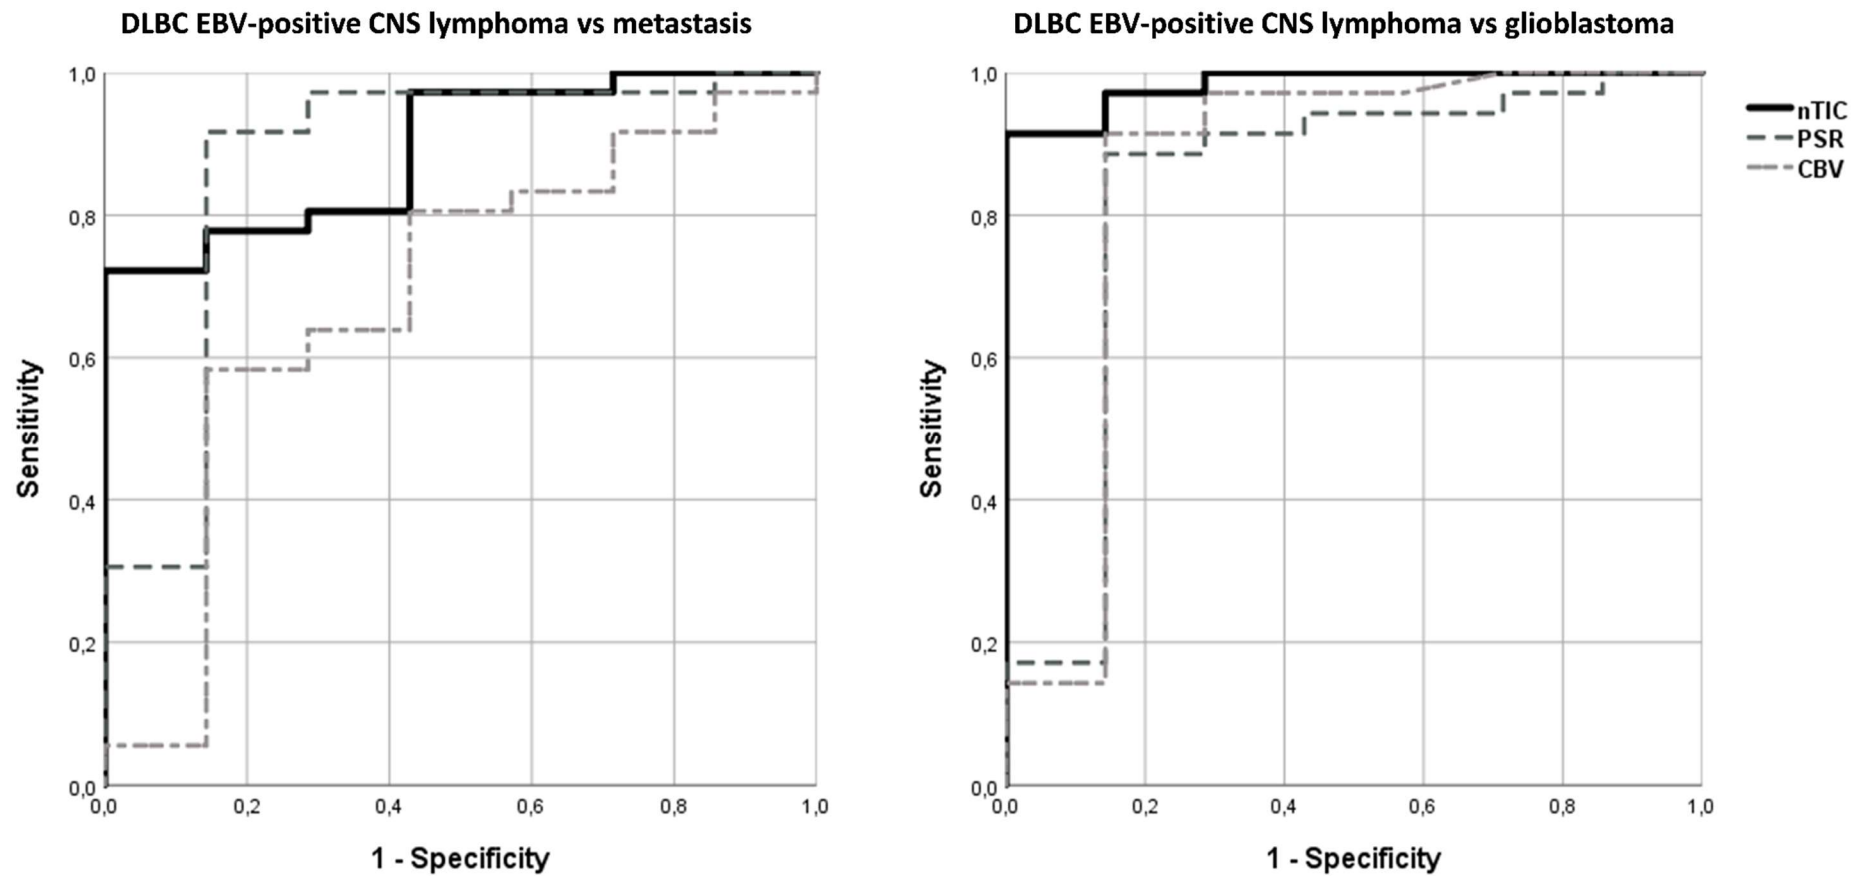

**Supplemental Figure 1.** ROC curves of nTIC algorithms, percentage of signal recovery (PSR), and relative CBV for pair-wised comparison of DLBC EBV-positive CNS lymphoma vs metastasis and vs glioblastoma.

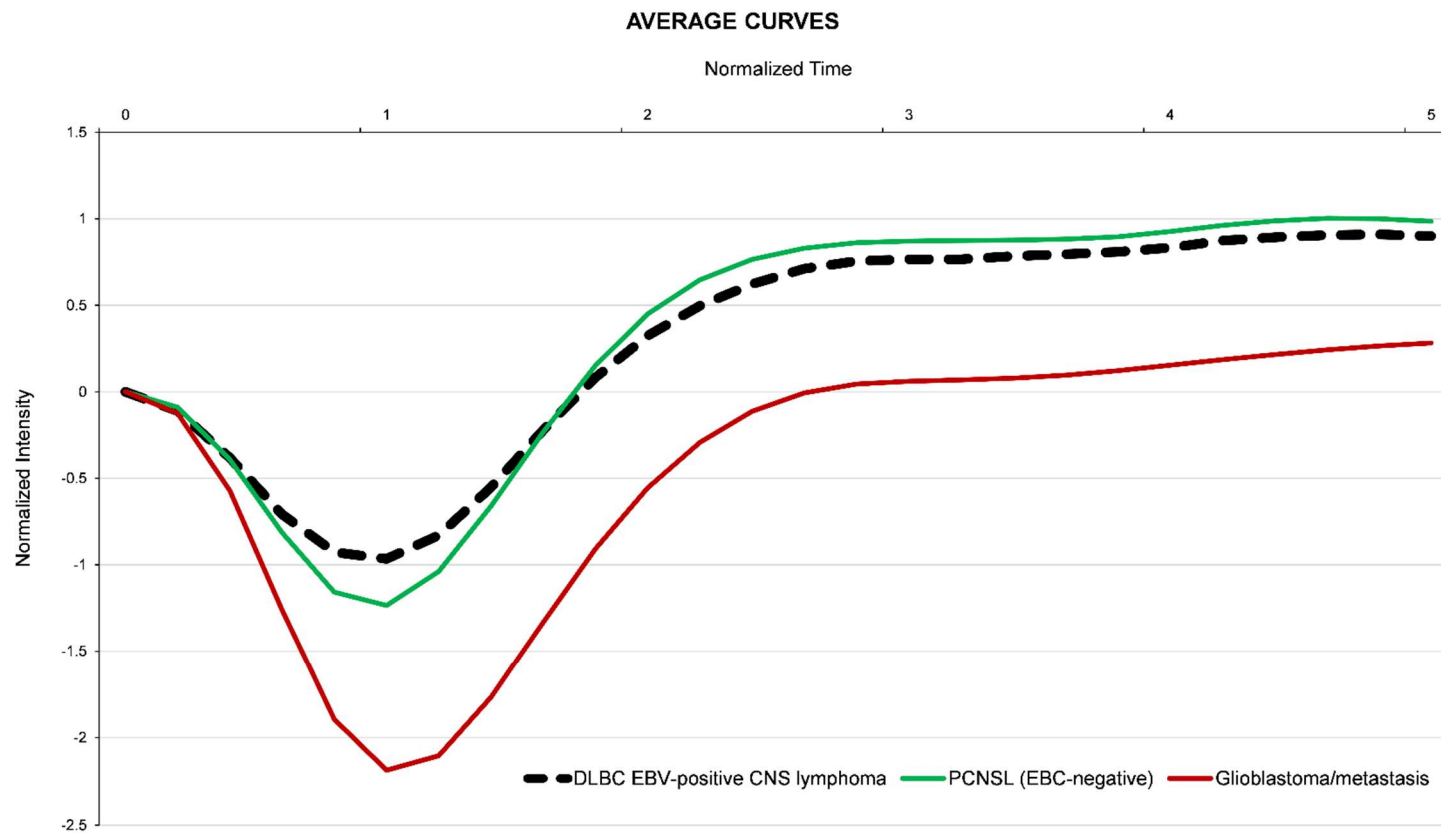

**Supplemental Figure 2.** Average normalized time-intensity curves of DLBC EBV-positive CNS lymphoma, PCNSL (EBV-negative) and glioblastoma/metastasis as a whole. Scarce differences may be seen between DLBCL EBV-positive CNS lymphoma and PCNSL. The most relevant visual differences between DLBCL EBV-positive CNS lymphoma and glioblastoma/ metastasis are seen around the maximal-signal-intensity-drop and the signal-recovery segments of the curves.

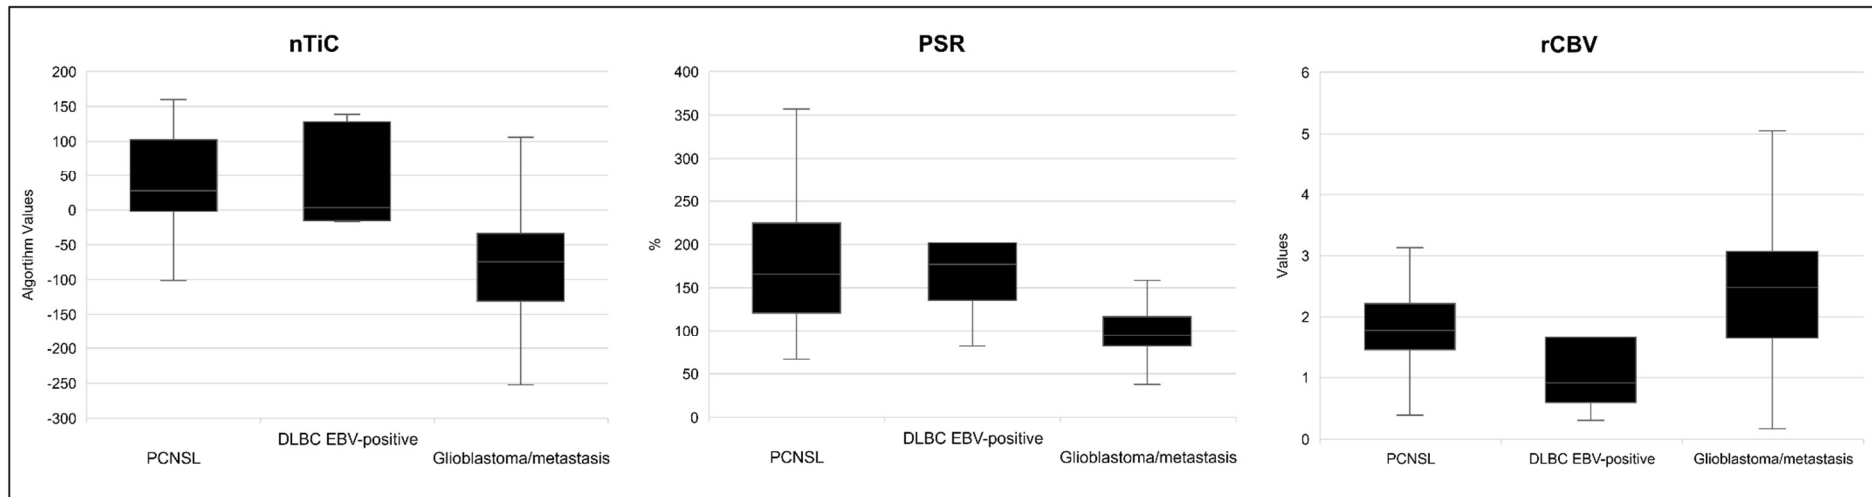

**Supplemental Figure 3.** Box plots depicting the results of the normalized time-intensity curve (nTIC) adapted algorithms to differentiate PCNSL vs glioblastoma/metastasis as a whole for each tumor subtype. Also, box plots for PSR and rCBV values for each tumor subtype.

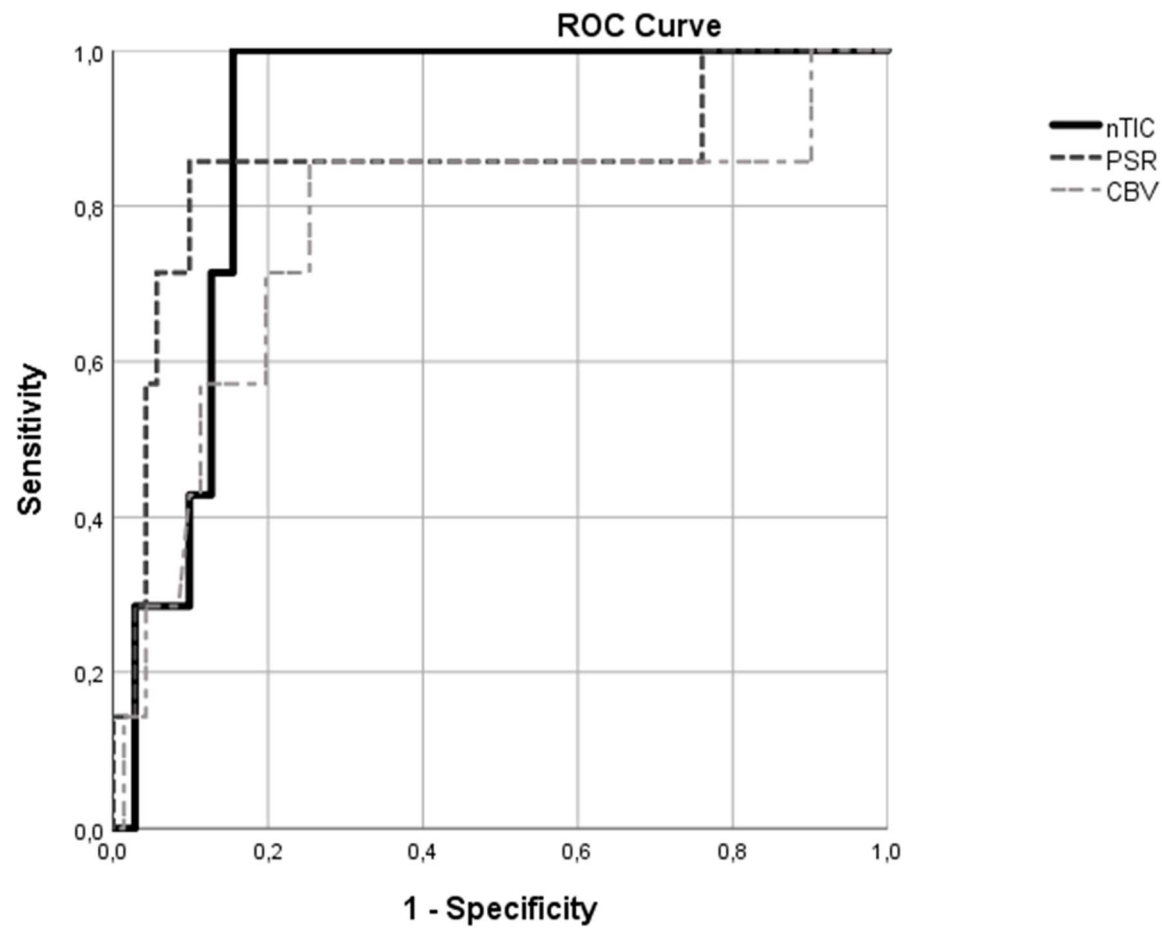

**Supplemental Figure 4.** ROC curves of nTIC algorithms, percentatge of signal recovery (PSR), and relative CBV for one-way comparison with glioblastoma/metastasis as a whole.
